# Supplementary material
Source: Springer Nature journal article supplement (https://www.springermedizin.de/resource/supplementary/13075_2009_2750_MOESM7_ESM.pdf/9692798)

**MHCII<sup>+</sup>CD16<sup>int</sup>**

**MHCII<sup>+</sup>CD16<sup>+</sup>**

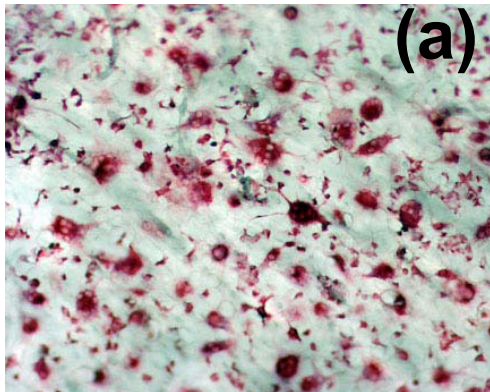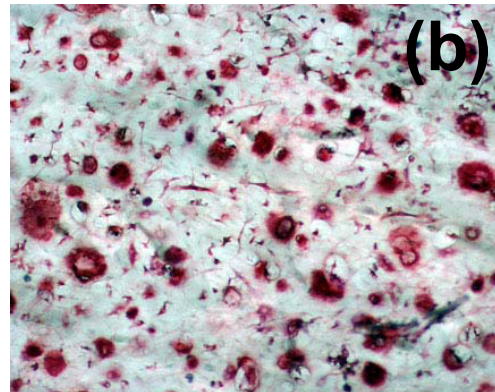

**osteoclasts**

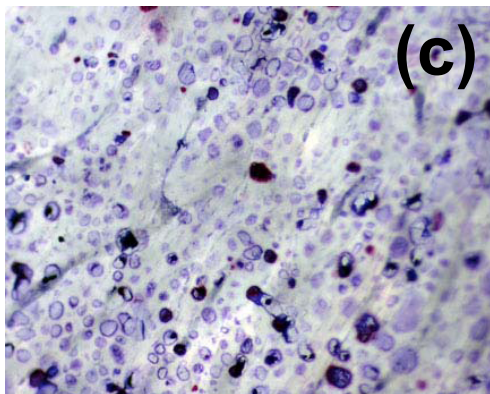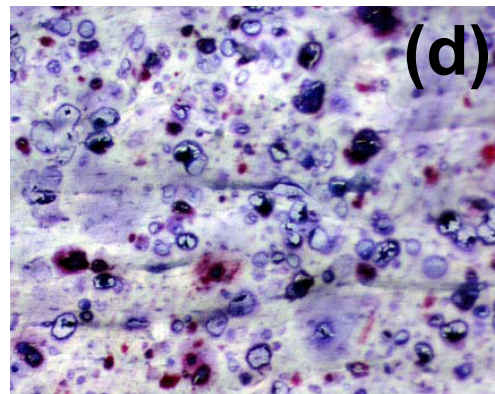

**pits  
on bone**

Supplement: MOESM7 [file 9692798]
